# Supplementary material for: Heteropoly acid catalysts for the synthesis of fragrance compounds from bio-renewables: acetylation of nopol and terpenic alcohols
Source: Royal Society of Chemistry journal article supplement (doi:10.1039/c6ra02266a), 2016-01-01
Supplement: c6ra02266a1.pdf [file c6ra02266a1.pdf]

# Heteropoly acid catalysts for the synthesis of fragrance compounds from bio-renewables: acetylation of nopol and terpenic alcohols

Vinicius V. Costa,<sup>a</sup> Kelly A. da Silva Rocha,<sup>b</sup> Luiz C. A. Oliveira,<sup>a</sup> Elena F. Kozhevnikova,<sup>c</sup> Ivan V. Kozhevnikov<sup>c</sup> and Elena V. Gusevskaya\*<sup>a</sup>

<sup>a</sup> Departamento de Química, Universidade Federal de Minas Gerais, 31270-901, Belo Horizonte, MG, Brazil  
Fax: (+)55 31 34095700, E-mail: [elena@ufmg.br](mailto:elena@ufmg.br)

<sup>b</sup> Departamento de Química, Universidade Federal de Ouro Preto, 35400-000, Ouro Preto, MG, Brazil

<sup>c</sup> Department of Chemistry, University of Liverpool, Liverpool L69 7ZD, UK

## Supplementary Information

Table of contents

UV spectra -----Fig. S1

Catalyst characterization data -----Fig. S2-S5

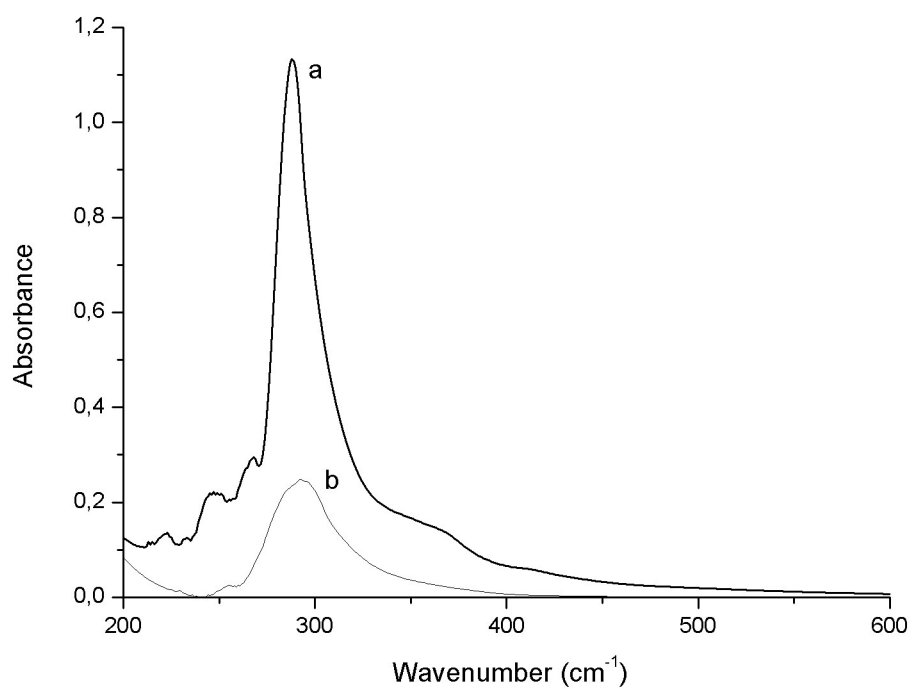

Fig. S1. UV spectra of the (a) reference solution of H<sub>3</sub>PW<sub>12</sub>O<sub>40</sub> in acetic anhydride (0,09 mM) and (b) supernatant obtained by the centrifugation of CsPW from the CsPW (15 mg)/Ac<sub>2</sub>O (5mL) mixture after 1 h stirring at room temperature (similar to the mixture used in run 11, Table 1).

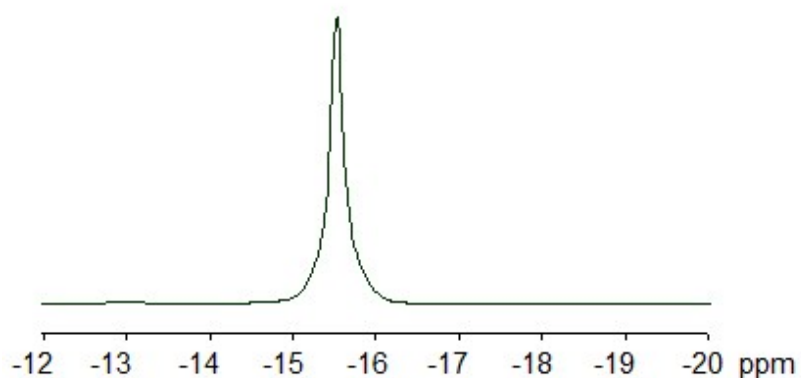

Fig. S2. <sup>31</sup>P MAS NMR for bulk H<sub>3</sub>PW<sub>12</sub>O<sub>40</sub>.

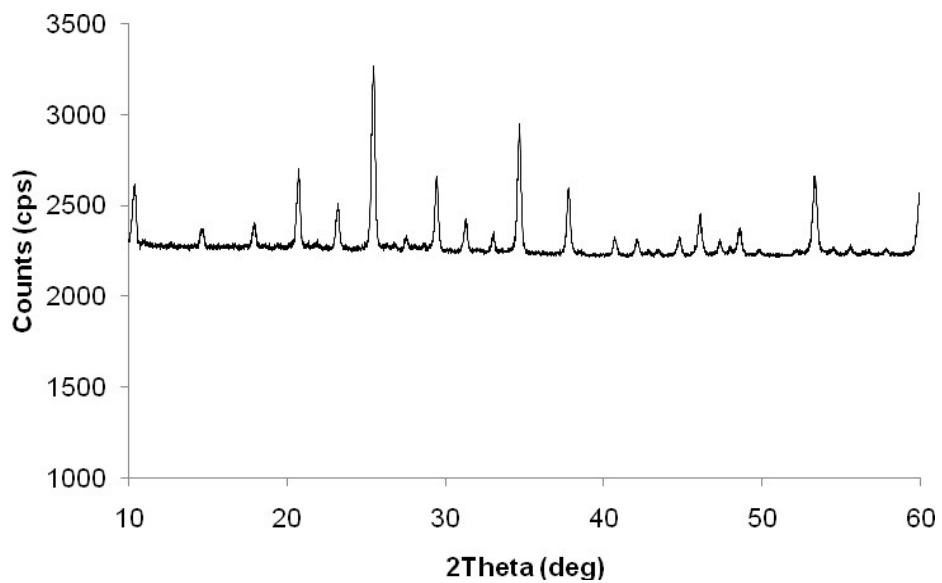

Fig. S3. XRD for bulk  $\text{H}_3\text{PW}_{12}\text{O}_{40}$ .

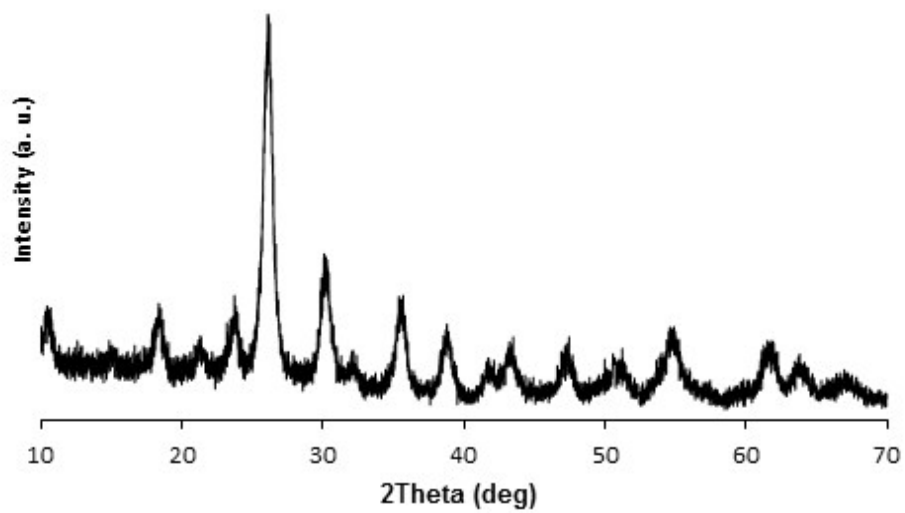

Fig. S4. XRD for bulk  $\text{Cs}_{2.5}\text{H}_{0.5}\text{PW}_{12}\text{O}_{40}$ .

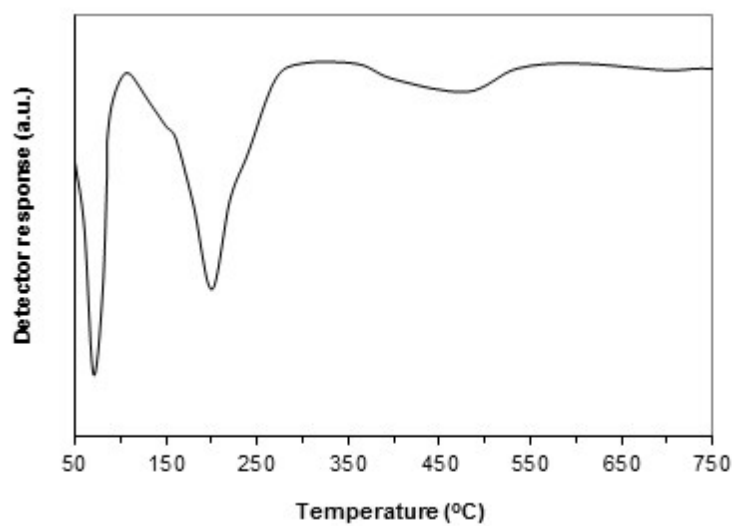

Fig. S5. TGA for H<sub>3</sub>PW<sub>12</sub>O<sub>40</sub> hydrate showing the loss of crystallization water (around 100 °C) followed by the loss of six water molecules in H<sub>3</sub>PW<sub>12</sub>O<sub>40</sub> hexahydrate (around 200 °C) and 1.5 H<sub>2</sub>O molecules of the constitutional water (around 450 °C).
